# Supplementary material for: How Molecular Typing Can Support Legionella Environmental Surveillance in Hot Water Distribution Systems: A Hospital Experience
Source: PubMed Central journal article supplement (PMC7700474; doi:10.3390/ijerph17228662), 2020-11-21
Supplement: ijerph-17-08662-s001.pdf [file ijerph-17-08662-s001.pdf]

# SUPPLEMENTARY FILES

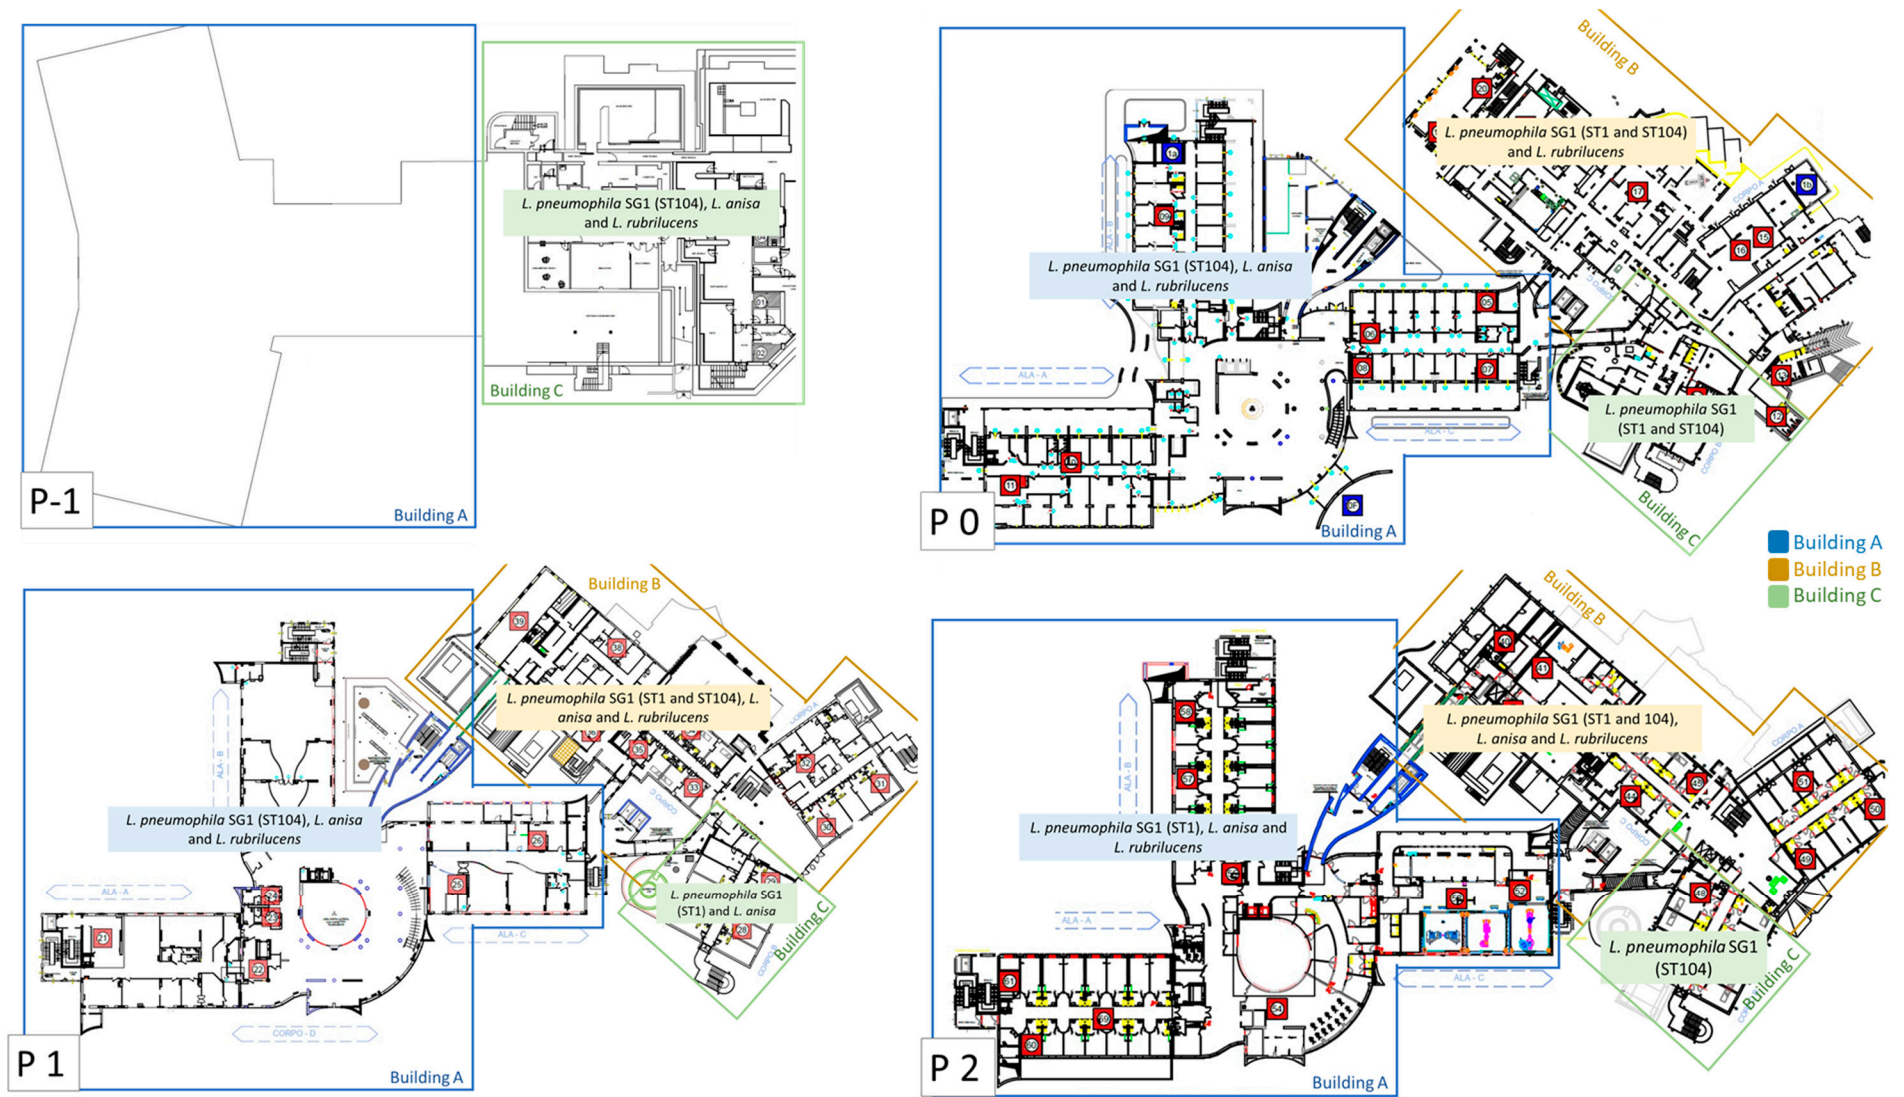

**Figure S1:** Risk map of *Legionella* spp. distribution in the Hospital: Building A (blue square), B (yellow square) and C (green square) (floors from -1 to 2)

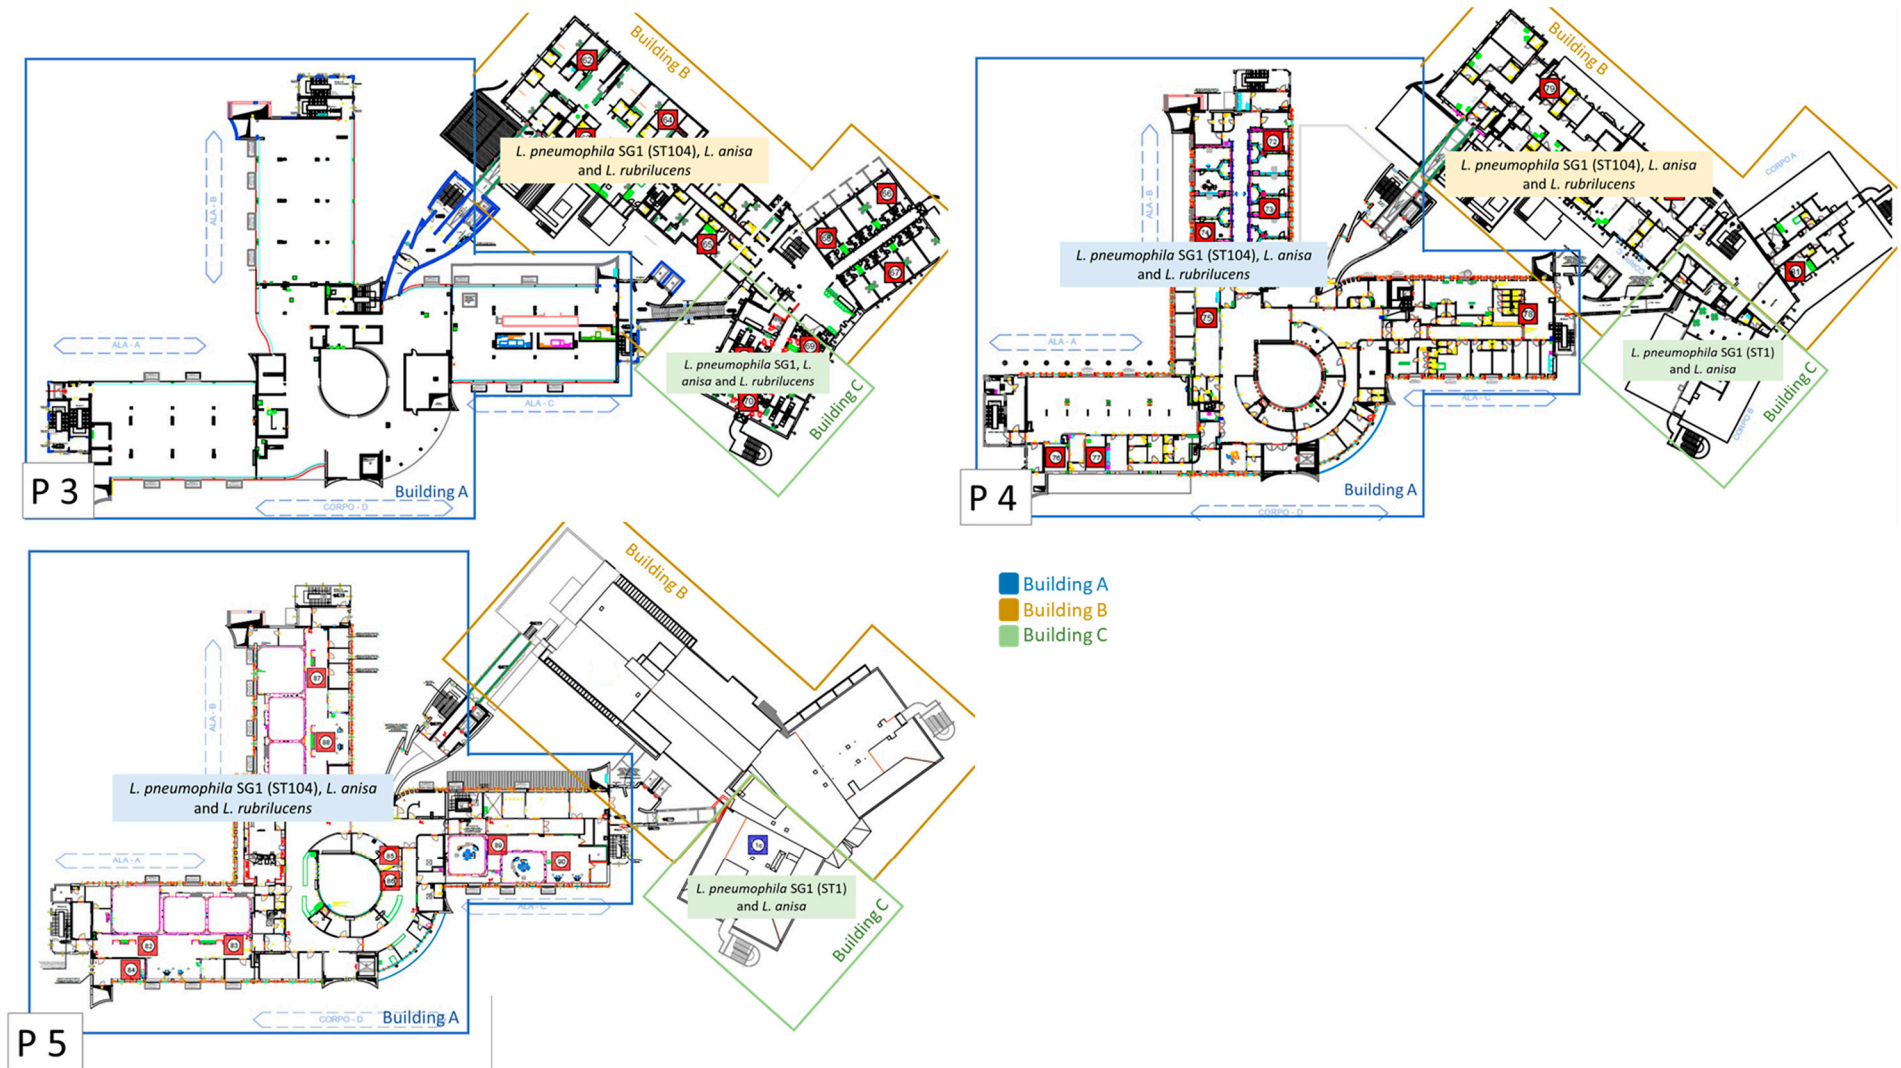

Figure S2: Risk map of *Legionella* spp. distribution in the Hospital: Building A (blue square), B (yellow square) and C (green square) (floors from -1 to 2)

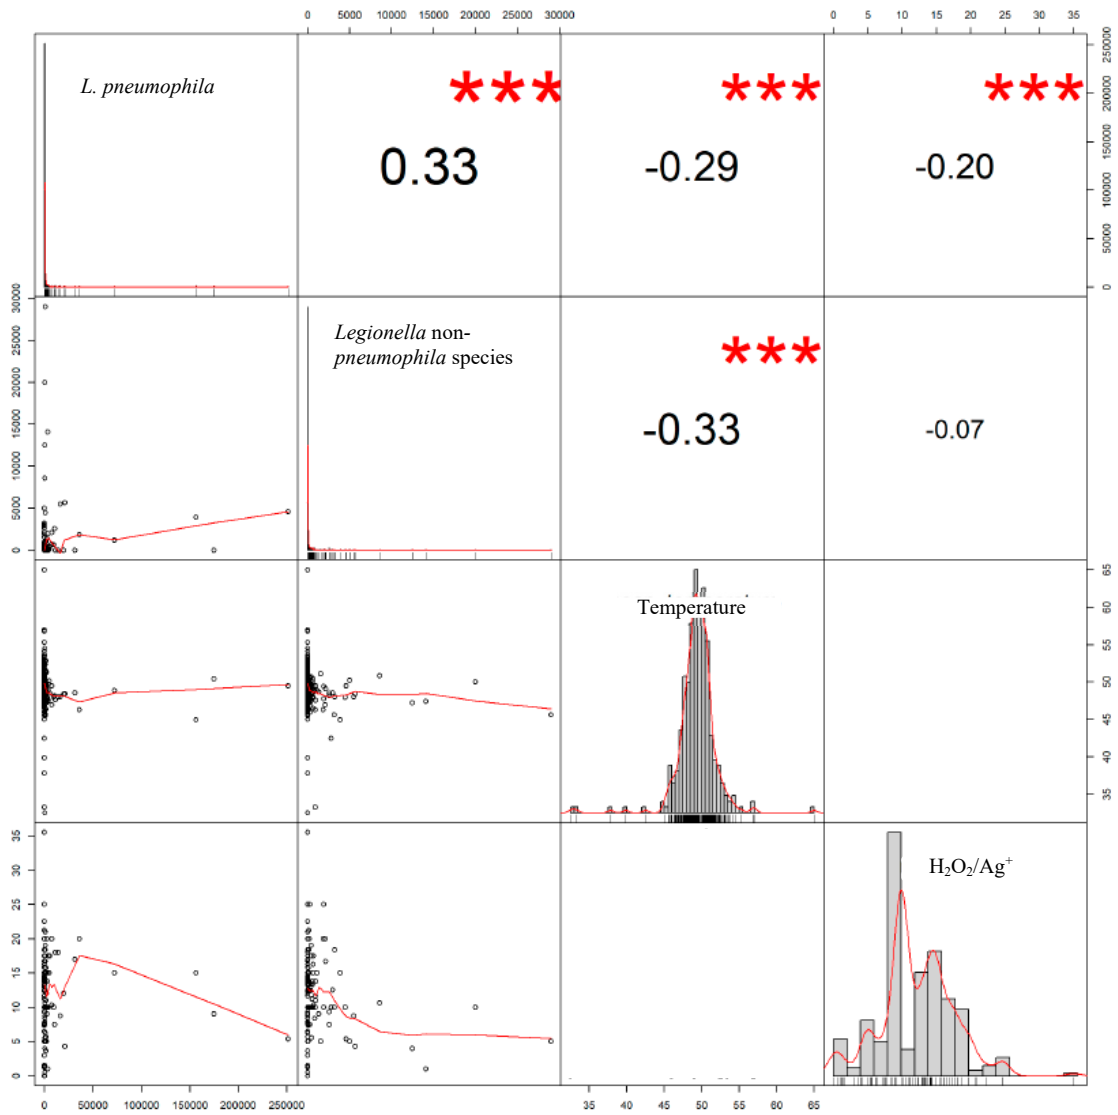

Figure S3: Correlation matrix of Hospital Complex: *Legionella* mean concentration vs temperature and disinfectant (\*\**p* value < 0.0001)

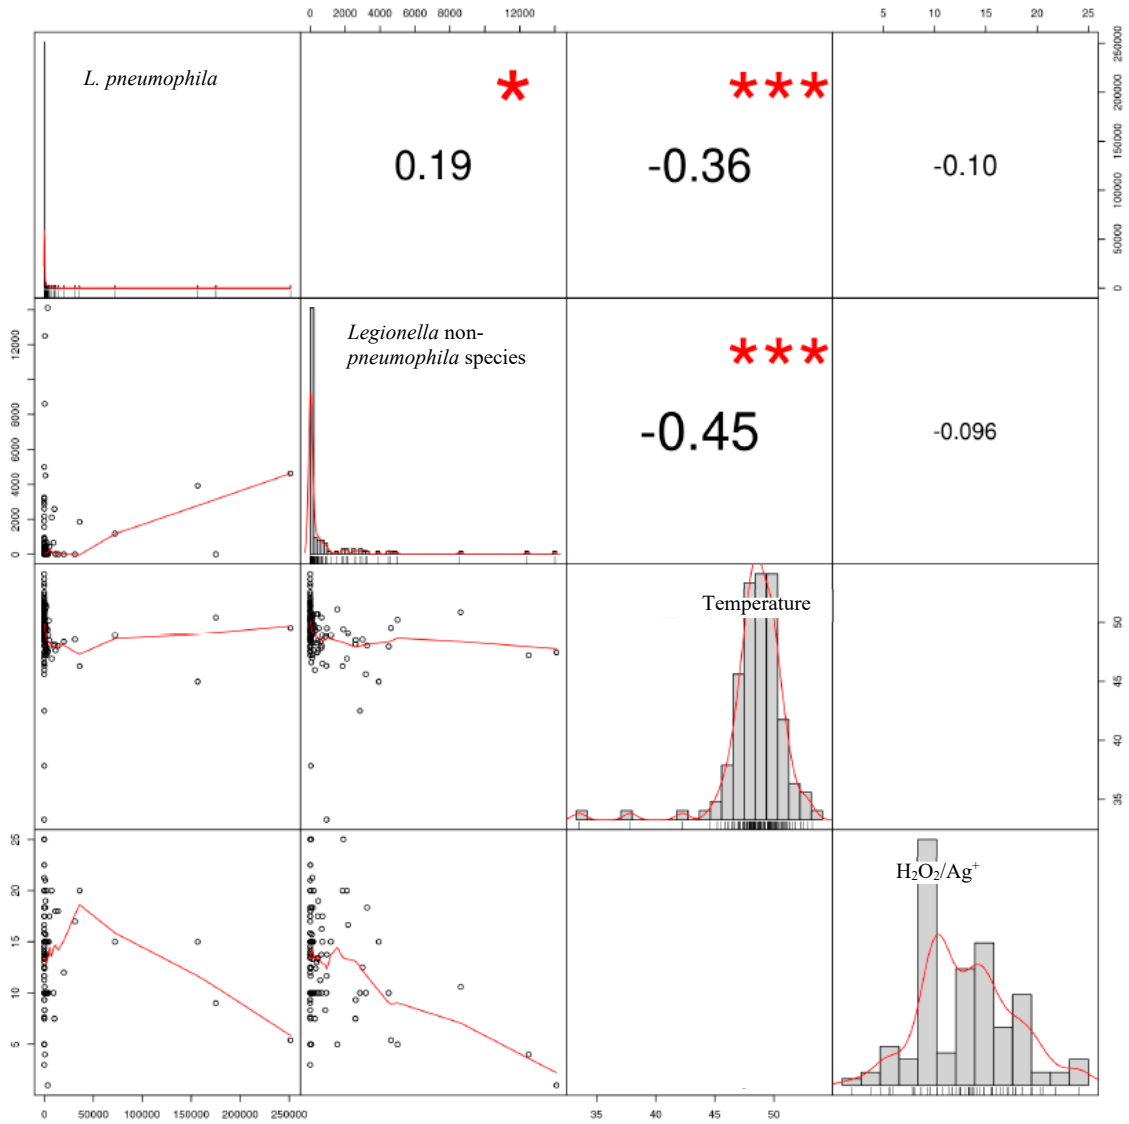

**Figure S4:** Correlation matrix of Building A: study of relationship between *L. pneumophila*, *Legionella non-pneumophila* species, temperature and disinfectant (\**p* value < 0.05, \*\*\**p* value < 0.0001)

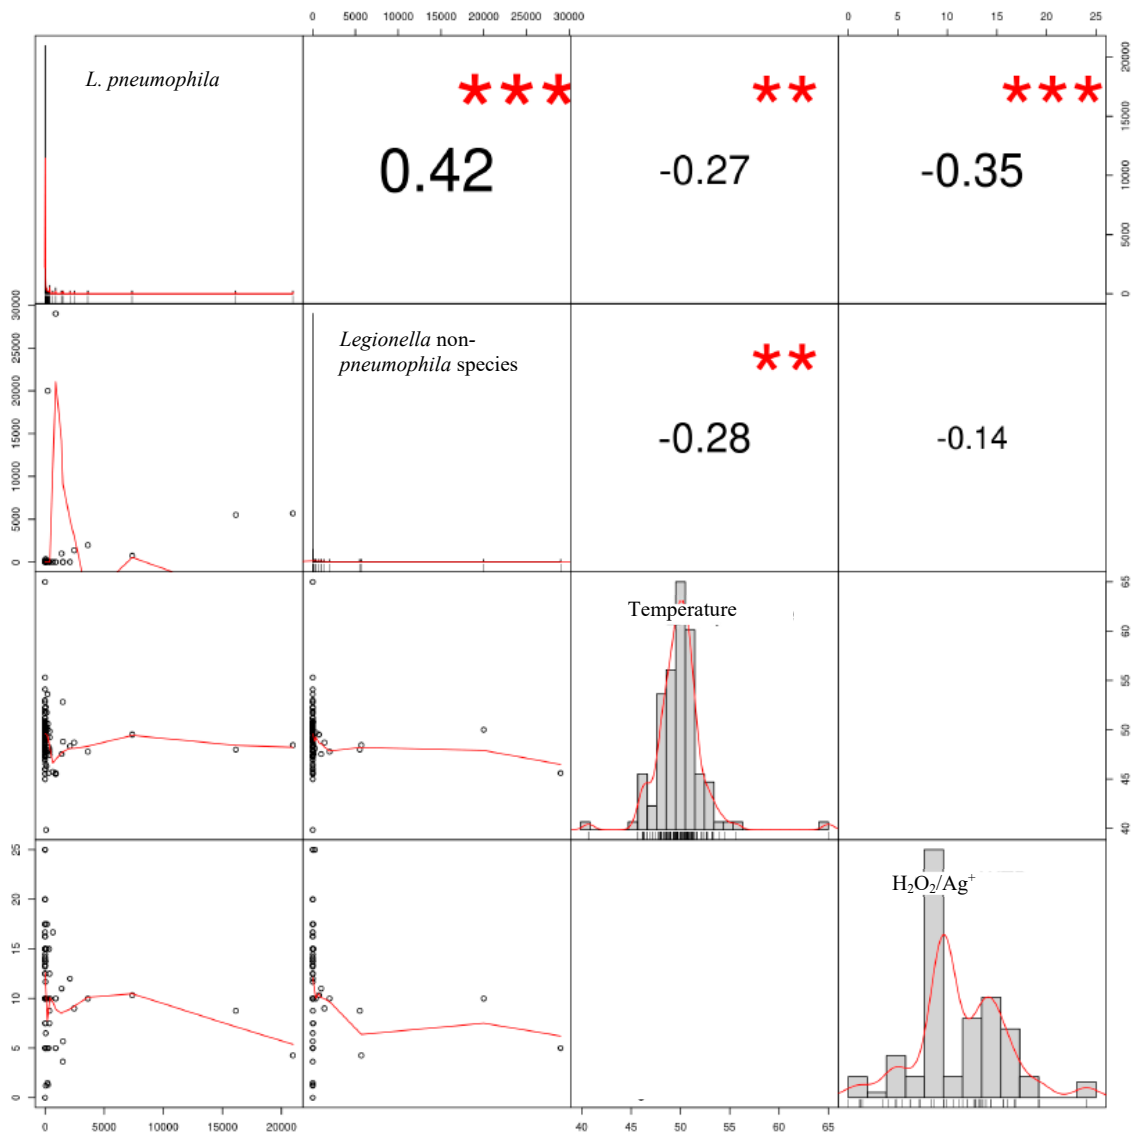

**Figure S5:** Correlation matrix of Building B: study of relationship between *L. pneumophila*, *Legionella non-pneumophila* species, temperature and disinfectant (\*\**p* value < 0.01, \*\*\**p* value < 0.0001)

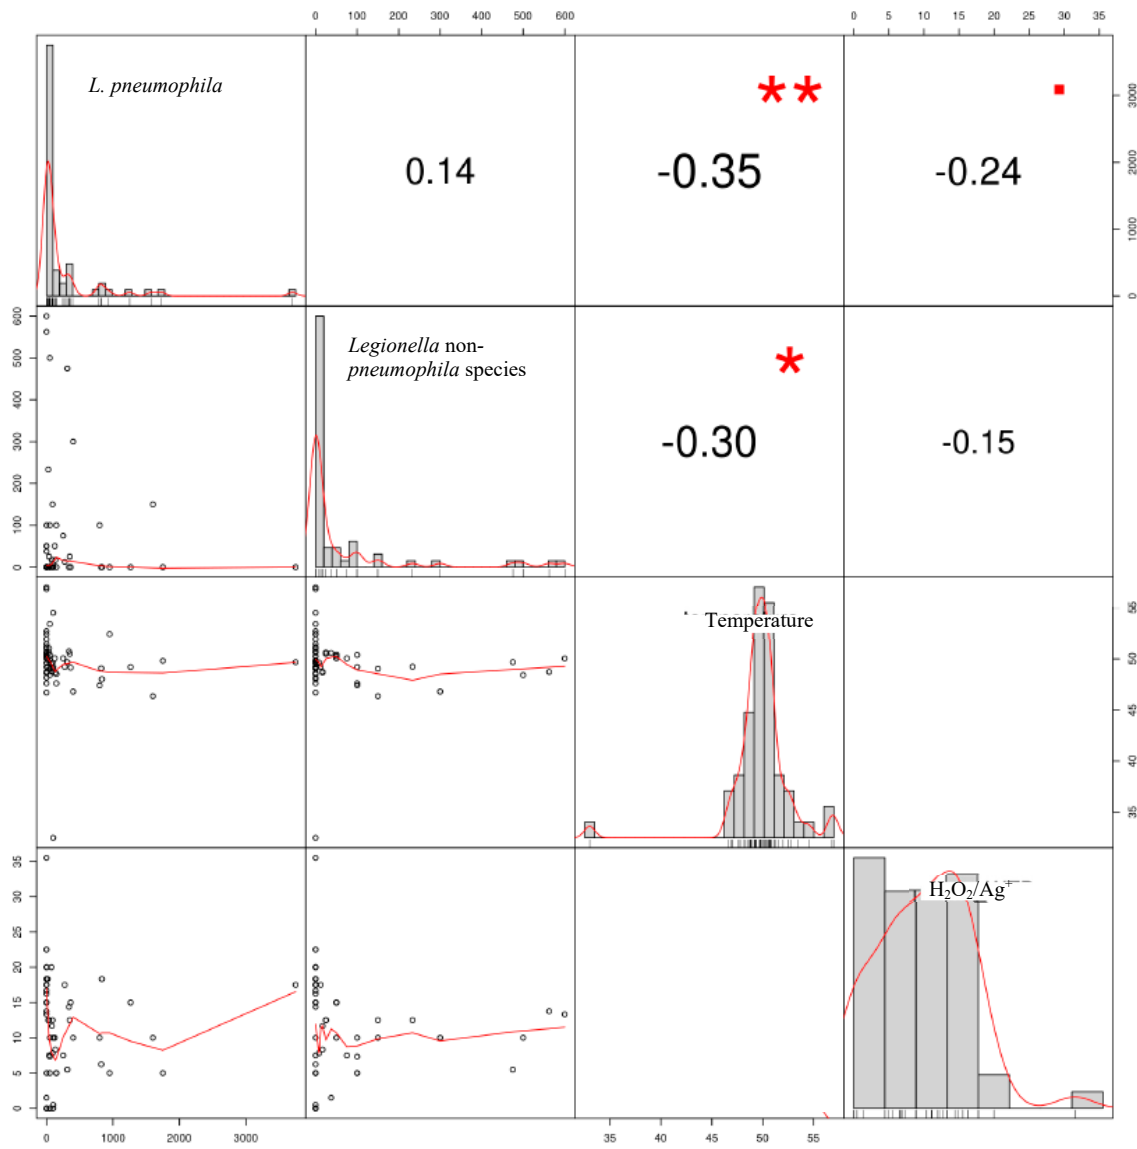

**Figure S6:** Correlation matrix of Building C: study of relationship between *L. pneumophila*, *Legionella non-pneumophila* species, temperature and disinfectant (\**p* value 0.05-0.1, \**p* value < 0.05, \*\**p* value < 0.01)

**Table S1:** Physical and chemical parameters of water in Hospital aqueduct, tap water output and hot water return lines

| Parameters                             | pH                                        | Hardness    | Conductivity | Turbidity      | Total iron  | Total phosphorus                   | Silver      | Temperature | Peroxide     |              |
|----------------------------------------|-------------------------------------------|-------------|--------------|----------------|-------------|------------------------------------|-------------|-------------|--------------|--------------|
| U.M.                                   |                                           | ° f         | µS/cm        | NTU            | mg/L        | mg/L P <sub>2</sub> O <sub>5</sub> | µg/L        | ° C         | mg/L         |              |
| <b>Sampling points<br/>(mean ± SD)</b> | <b>Water reservoir</b>                    | 7.89 ± 0.33 | 12.08 ± 3.98 | 399.21 ± 34.21 | 0.37 ± 0.06 | <0.04                              | <0.3        | <3          | 17.80 ± 1.97 | not detected |
|                                        | <b>Water Output outlets</b>               | 7.83 ± 0.28 | 11.15 ± 4.03 | 402.35 ± 33.82 | 0.41 ± 0.08 | <0.04                              | <0.2        | <3          | 13.72 ± 4.41 | not detected |
|                                        | <b>Hot water return line (Building A)</b> | 7.93 ± 0.26 | 12.23 ± 3.04 | 415.87 ± 40.86 | 0.38 ± 0.09 | <0.04                              | 3.17 ± 1.27 | <3          | 49,50 ± 0,94 | 13,70 ± 4,03 |
|                                        | <b>Hot water return line (Building B)</b> | 7.95 ± 0.25 | 12.73 ± 3.55 | 419.32 ± 41.56 | 0.50 ± 0.29 | <0.04                              | 3.25 ± 1.90 | <3          | 49,84 ± 0,56 | 12,24 ± 5,90 |
|                                        | <b>Hot water return line (Building C)</b> | 7.85 ± 0.17 | 12.35 ± 2.22 | 421.22 ± 28.76 | 0.91 ± 0.87 | <0.04                              | 1.58 ± 0.78 | <3          | 49,64 ± 0,84 | 10,48 ± 5,07 |
